# Supplementary material for: One-, Two-, and Three-Parameter Isotherms, Kinetics, and Thermodynamic Evaluation of Co(II) Removal from Aqueous Solution Using Dead Neem Leaves
Source: Hindawi journal article supplement (doi:10.1155/2019/6452672), 2019-11-27
Supplement: f1 [file 6452672.f1.docx]

**Plot equations for different isotherm models**

| **Isotherm** | **Linearized equation obtained/ R2** | | |
| --- | --- | --- | --- |
|  | **10 mg/L** | **100 mg/L** | **500mg/L** |
| **One-parameter isotherm** | | | |
| Henry’s Isotherms | y = -1x + 10, R² = 1 | y = -1x + 100, R² = 1 | y = -1x + 500, R² = 1 |
|  | **Two-parameter isotherms** | | |
| Freundlich | y = -0,1956x + 2,2193, R² = 0,9993 | y = -0,1184x + 4,7724 R² = 0,9992 | y = -0,0285x + 6,2613, R² = 0,9995 |
| Jovanovic | y = -0,1197x + 2,3195 R² = 1 | y = -0,0112x + 4,6117 R² = 1 | y = -0,0021x + 6,215 R² = 1 |
| Langmuir 1 | y = -0,0381x + 0,1431 R² = 0,9971 | y = -0,014x + 0,0125 R² = 0,9967 | y = -0,0008x + 0,0021 R² = 0,9982 |
| Langmuir 2 | y = 0,1432x - 0,0383 R² = 0,9999 | y = 0,0125x - 0,014 R² = 1 | y = 0,0021x - 0,0008 R² = 1 |
| Langmuir 3 | y = 0,2662x + 6,9902 R² = 0,9979 | y = 1,116x + 79,95 R² = 0,9974 | y = 0,3819x + 472,7 R² = 0,9983 |
| Langmuir 4 | y = 3,7487x - 26,193 R² = 0,9979 | y = 0,8937x - 71,426 R² = 0,9974 | y = 2,6137x - 1235,5 R² = 0,9983 |
| Langmuir 5 | y = -26,17x + 3,746 R² = 0,9971 | y = -71,375x + 0,8931 R² = 0,9967 | y = -1235,3x + 2,6135 R² = 0,9982 |
| Temkin | y = -1,6352x + 9,1625 R² = 0,9995 | y = -10,582x + 114,36 R² = 0,9993 | y = -13,836x + 522,49 R² = 0,9996 |
| Elovich | y = 0,7309x - 4,4778 R² = 0,9997 | y = 0,1056x - 7,3087 R² = 0,9995 | y = 0,0743x - 32,56 R² = 0,9996 |
| DubinineRadushkevich | y = 0,0845x + 1,9999 R² = 0,9965 | y = 1,1855x + 4,4313 R² = 0,9941 | y = 0,4736x + 6,1718 R² = 0,9964 |
| Fowler–Guggenheim | y = -13,063x + 9,6957 R² = 0,9996 | y = -19,579x + 17,675 R² = 0,9995 | y = -72,783x + 69,82 R² = 0,9996 |
| Kiselev | y = -25,186x + 33,534 R² = 0,9942 | y = -11,652x + 13,877 R² = 0,9933 | y = -172,78x + 180,3 R² = 0,9961 |
| Hill–de Boer | y = -44,843x + 31,164 R² = 0,9988 | y = -108,82x + 89,1 R² = 0,9978 | y = -1343,6x + 1270,2 R² = 0,9984 |
| Langmuir-Freundlich | y = -0,9952x - 1,3185 R² = 0,9975 | y = -1,0109x + 0,1301 R² = 0,9966 | y = -1,3667x - 0,3012 R² = 0,9972 |
| Harkin-Jura Isotherm | y = 0,0056x + 0,0116 R² = 0,9988 | y = 3E-05x + 6E-05 R² = 0,9988 | y = 2E-07x + 4E-06 R² = 0,9995 |
| Halsey | y = -0,1956x + 2,2193 R² = 0,9993 | y = -0,1184x + 4,7724 R² = 0,9992 | y = -0,0285x + 6,2613 R² = 0,9995 |
| Flory-Huggins | y = -0,216x - 2,8723 R² = 0,9994 | y = -0,1184x - 4,9831 R² = 0,9992 | y = -0,0289x - 6,3463 R² = 0,9995 |
|  | **Three-parameter isotherm** | | |
| Redlich-Peterson | y = 1,6737x + 0,0988,  R² = 1; KR = 18 | y =1,5048x-2.4843, R² = 1;  KR = 33 | y = 1,4066x-2,6927, R² = 1; KR = 131 |
